# Supplementary material for: Microfluidic Chip for Molecular Amplification of Influenza A RNA in Human Respiratory Specimens
Source: PLoS One. 2012 Mar 22;7(3):e33176. doi: 10.1371/journal.pone.0033176 (PMC3310856; doi:10.1371/journal.pone.0033176)
Supplement: Table S1 — Summary of the patient specimens tested in the microfluidic assay and bench top RT-PCR. (XLS) [file pone.0033176.s005.xls]

## Sheet: Sheet1
Table S1. Summary of the patient specimens tested in the microfluidic assay and bench top RT-PCR.
StudyID	Age	Chip yield (pg/ul)	Sample type	Storage solution	Avg Ct Type A (Tube)	Type A load copies/ml (calculated)	DFA	Rapid flu test 1=positive, 2=negative
1	38	0	NPA	VTM	undet.	-	nd	nd
2	70	0	NPA	VTM	undet.	-	nd	nd
6	61	0	NPA	VTM	undet.	-	nd	nd
8	5	0	NPA	VTM	42.9	-	nd	2
9	0	700	NPA	VTM	17.49	92000000	nd	1
10	37	0	NPA	VTM	undet.	-	nd	2
12	10	0	NPA	VTM	undet.	-	nd	2
13	23	0	NPA	VTM	43.6	-	nd	nd
14	44	0	NPA	VTM	undet.	-	nd	nd
15	34	0	NPA	VTM	41.38	-	nd	nd
16	4	0	NPA	VTM	42.77	-	nd	1
17	13	663	NPA	VTM	13.5	14000000000	nd	2
18	37	926.2	NPA	VTM	18.34	540000000	nd	nd
20	43	0	NPA	VTM	43.37	-	nd	nd
21	44	984.7	NPA	VTM	17.5	840000000	nd	2
22	53	0	NPA	VTM	undet.	-	nd	nd
23	31	0	NPA	VTM	42.79	-	nd	1
24	6	0	NPA	VTM	undet.	-	nd	nd
25	65	0	NPA	VTM	undet.	-	nd	nd
26	0	0	NPA	VTM	40.25	-	nd	nd
27	38	0	NPA	VTM	undet.	-	nd	nd
31	27	80.3	NPA	VTM	28.12	54000	nd	nd
32	52	0	NPA	VTM	undet.	-	nd	2
37	41	92.9	NPA	VTM	26.58	1200000	nd	2
38	20	0	NPA	VTM	undet.	-	nd	2
39	15	0	NPA	VTM	undet.	-	nd	nd
40	0	0	NPA	VTM	undet.	-	nd	nd
41	29	0	NPA	VTM	undet.	-	nd	nd
43	60	0	NPA	VTM	undet.	-	nd	nd
45	26	0	NPA	VTM	undet.	-	nd	nd
51	32	0	NPA	VTM	undet.	-	nd	2
52	41	360.9	NPA	VTM	21.04	290000000	nd	nd
53	16	954.4	NPA	VTM	22.77	110000000	nd	nd
54	17	246.3	NPA	VTM	19.49	800000000	nd	nd
55	23	623.2	NPA	VTM	24.79	30000000	nd	nd
56	39	0	NPA	VTM	undet.	-	nd	nd
57	24	0	NPA	VTM	undet.	-	nd	nd
58	64	0	NPA	VTM	undet.	-	nd	2
59	61	0	NPA	VTM	undet.	-	nd	2
60	22	0	NPA	VTM	undet.	-	nd	2
61	28	283.3	NPA	VTM	26.41	9800000	nd	nd
62	20	197.2	NPA	VTM	27.43	5000000	nd	nd
63	14	729.4	NPA	VTM	18.68	360000000	nd	1
64	50	0	NPA	VTM	undet.	-	nd	nd
85	18	0	NPA	VTM	undet.	-	nd	2
89	17	0	NPA	VTM	undet.	-	nd	nd
90	11	0	NPA	VTM	undet.	-	nd	2
91	43	0	NPA	VTM	33.23	370000	nd	nd
92	20	0	NPA	VTM	undet.	-	nd	2
94	N/A	0	NPA	VTM	undet.	-	nd	2
95	21	0	NPA	VTM	undet.	-	nd	2
97	20	57	NPA	VTM	27.78	510000	nd	2
102	3	864.1	NPA	VTM	18.52	390000000	nd	2
110	9	125.1	NPA	VTM	24.09	7100000	nd	2
111	5	43	NPA	VTM	37.54	5900	nd	2
112	24	0	NPA	VTM	undet.	-	nd	nd
113	30	0	NPA	VTM	undet.	-	nd	2
114	16	118	NPA	VTM	19.59	180000000	nd	1
115	14	497	NPA	VTM	19.14	56000000	nd	nd
116	27	349.9	NPA	VTM	28.01	3400000	nd	nd
117	24	384.5	NPA	VTM	16.74	210000000	nd	nd
118	19	0	NPA	VTM	32.04	24000	nd	2
119	20	156.9	NPA	VTM	20.92	70000000	nd	1
120	21	1246.4	NPA	VTM	20.43	100000000	nd	1
121	19	0	NPA	VTM	undet.	-	nd	2
122	20	0	NPA	VTM	undet.	-	nd	2
123	29	63.8	NPA	VTM	21.48	47000000	nd	1
124	18	0	NPA	VTM	undet.	-	nd	2
125	29	0	NPA	VTM	undet.	-	nd	nd
141	13	0	NPA	VTM	undet.	-	nd	nd
142	N/A	894.5	NPA	VTM	20.14	990000000	nd	nd
143	N/A	0	NPA	VTM	undet.	-	nd	nd
144	23	1414	NPA	VTM	17.8	660000000	nd	1
145	23	0	NPA	VTM	undet.	-	nd	nd
146	22	0	NPA	VTM	undet.	-	nd	nd
147	52	0	NPA	VTM	undet.	-	nd	nd
148	16	0	NPA	VTM	undet.	-	nd	nd
149	19	0	NPA	VTM	undet.	-	nd	2
150	27	0	NPA	VTM	undet.	-	nd	nd
151	41	0	NPA	VTM	undet.	-	nd	nd
171	28	101	NPA	VTM	25.09	41000000	nd	nd
172	21	0	NPA	VTM	undet.	-	nd	nd
173	52	0	NPA	VTM	31.48	670000	nd	nd
174	23	0	NPA	VTM	undet.	-	nd	nd
175	38	0	NPA	VTM	undet.	-	nd	2
176	23	441.3	NPA	VTM	13.93	11000000000	nd	2
180	8	820.7	NPA	VTM	18.39	2700000000	nd	nd
181	21	418.2	NPA	VTM	22.19	250000000	nd	2
210	6	150.8	NPA	VTM	22.27	210000000	nd	nd
211	10	145.2	NPA	VTM	26.53	14000000	nd	nd
269	22 mos.	0	NPA	VTM	undet.	-	nd	2
270	48	0	NPA	VTM	undet.	-	nd	nd
271	3	0	NPA	VTM	undet.	-	nd	nd
272	12	0	NPA	VTM	undet.	-	nd	nd
273	0	0	NPA	VTM	undet.	-	nd	nd
274	N/A	0	NPA	VTM	undet.	-	nd	nd
275	7	0	NPA	VTM	undet.	-	nd	nd
276	35	0	NPA	VTM	undet.	-	nd	2
298	11	0	NPA	VTM	undet.	-	nd	nd
299	24	0	NPA	VTM	undet.	-	nd	nd
302	4	0	NPA	VTM	undet.	-	nd	nd
303	44	0	NPA	VTM	undet.	-	nd	nd
304	15	0	NPA	VTM	undet.	-	nd	nd
305	35	0	NPA	VTM	undet.	-	nd	nd
306	48	0	NPA	VTM	undet.	-	nd	nd
307	37	0	NPA	VTM	undet.	-	nd	nd
308	5	0	NPA	VTM	undet.	-	nd	nd
309	21	0	NPA	VTM	undet.	-	nd	nd
1B	N/A	150.9	NPS	PBS	24.7	130000000	A	nd
2B	N/A	144.9	NPA	PBS	23.58	260000000	A	nd
3B	N/A	67.4	NPS	PBS	24.88	110000000	A	nd
4B	N/A	210.7	NPA	PBS	22.87	410000000	A	nd
5B	N/A	348.8	NPS	PBS	24.09	190000000	A	nd
6B	N/A	150.8	NPS	PBS	28.36	12000000	A	nd
7B	N/A	412.5	NPS	PBS	24.42	150000000	A	nd
8B	N/A	203.4	NPS	PBS	25.7	66000000	A	nd
9B	N/A	1169.3	NPS	PBS	20.65	1700000000	A	nd
10B	N/A	555.6	NPS	PBS	27.09	27000000	A	nd
11B	N/A	124	NPS	PBS	32.12	1100000	A	nd
12B	N/A	395.4	NPS	PBS	23.47	280000000	A	nd
13B	N/A	507.9	NPS	PBS	23.27	310000000	A	nd
14B	N/A	162.2	NPS	PBS	28.32	12000000	A	nd
15B	N/A	1186.7	NPS	PBS	17.37	14000000000	A	nd
16B	N/A	658.4	NPS	PBS	21.75	830000000	A	nd
17B	N/A	703.3	NPS	PBS	23.47	280000000	A	nd
18B	N/A	744.4	NPS	PBS	22.68	460000000	A	nd
19B	N/A	749.4	NPS	PBS	22.22	610000000	A	nd
20B	N/A	1061	NPS	PBS	20.17	1500000000	A	nd
21B	N/A	322.2	NPS	PBS	19.45	2000000000	A	nd
22B	N/A	192.7	NPS	PBS	25.85	7000000	A	nd
23B	N/A	168.9	NPS	PBS	26.74	34000000	A	nd
24B	N/A	1472.1	NPS	PBS	18.18	2900000000	A	nd
25B	N/A	476.8	NPS	PBS	21.77	290000000	A	nd
26B	N/A	712.9	NPS	PBS	20.68	590000000	A	nd
27B	N/A	984.7	NPS	PBS	18.63	2200000000	A	nd
28B	N/A	124.3	NPA	PBS	27.48	7500000	A	nd
29B	N/A	301	NPS	PBS	22	250000000	A	nd
30B	N/A	70.1	NPS	PBS	27.4	7900000	A	nd
31B	N/A	97.6	NPS	PBS	27.61	6900000	A	nd
32B	N/A	208	NPS	PBS	23.96	68000000	A	nd
33B	N/A	312.2	NPS	PBS	24.05	64000000	A	nd
34B	N/A	745	NPS	PBS	19.99	790000000	A	nd
35B	N/A	562.3	NPS	PBS	17.72	3200000000	A	nd
36B	N/A	311.6	NPS	PBS	17.19	4500000000	A	nd
37B	N/A	423.7	NPS	PBS	20.05	760000000	A	nd
38B	N/A	525.1	NPS	PBS	26.57	13000000	A	nd
(nd = not done; A = influenza A;undet = undetected)
Samples with CT values higher than 40 were not assigned a viral load.
The CDC RUO protocol considers CT values greater than 40 to be a negative result.
