# Supplementary material for: Microfluidic Chip for Molecular Amplification of Influenza A RNA in Human Respiratory Specimens
Source: PLoS One. 2012 Mar 22;7(3):e33176. doi: 10.1371/journal.pone.0033176 (PMC3310856; doi:10.1371/journal.pone.0033176)
Supplement: Table S3 — Summary of the patient specimens tested by rapid immunoassay and bench top RT-PCR. (XLS) [file pone.0033176.s007.xls]

## Sheet: Sheet1
Table S3. Summary of the patient specimens tested by rapid immunoassay and bench top RT-PCR
StudyID	Age	Rapid Immunoassay Result	Avg Ct Type A (Tube)	Type A load copies/ml (calculated)	Avg Ct Type B (tube)
3	21	A	23.7	9500000	undet.
7	34 mos.	B	undet.	-	26.14
8	5	neg.	undet.	-	27.88
10	37	neg.	undet.	-	18.27
11	5	B	undet.	-	21.35
12	10	neg.	undet.	-	22.49
16	4	B	undet.	-	undet.
17	13	neg.	13.5	14000000000	undet.
19	47	B	undet.	-	16.7
21	44	neg.	17.5	840000000	undet.
23	31	B	undet.	-	19.64
28	14	neg.	undet.	-	undet.
30	9	neg.	18.66	360000000	undet.
32	52	neg.	undet.	-	undet.
33	4	A	16.1	2400000000	undet.
36	26	neg.	20.4	100000000	undet.
37	41	neg.	26.58	1200000	undet.
38	20	neg.	undet.	-	undet.
42	21	A	15.44	4400000000	undet.
44	35 mos.	A	16.84	1400000000	undet.
47	18	neg.	undet.	-	undet.
48	3	B	undet.	-	15.63
50	70	neg.	18.5	400000000	undet.
51	32	neg.	undet.	-	undet.
58	64	neg.	undet.	-	undet.
59	61	neg.	undet.	-	14.58
60	22	neg.	undet.	-	undet.
63	14	A	18.68	360000000	undet.
67	35	A	17.68	720000000	undet.
68	45	neg.	undet.	-	undet.
70	44	A	19.59	180000000	undet.
71	42	B	undet.	-	17.61
74	28	neg.	undet.	-	14.81
84	19	neg.	undet.	-	undet.
85	18	neg.	undet.	-	undet.
88	10	neg.	undet.	-	undet.
90	11	neg.	undet.	-	undet.
92	20	neg.	undet.	-	undet.
93	20	A	19.92	140000000	undet.
94	12 mos.	neg.	undet.	-	undet.
95	21	neg.	undet.	-	undet.
96	16	A	17.74	690000000	undet.
97	20	neg.	27.78	510000	undet.
98	44	neg.	25.1	3500000	undet.
99	21	neg.	undet.	-	undet.
100	21	A	23.1	15000000	undet.
101	16	neg.	26.08	1700000	undet.
102	3	neg.	18.52	390000000	undet.
103	20	neg.	undet.	-	undet.
104	19	B	undet.	-	19.66
105	18	neg.	undet.	-	undet.
107	18	A	19.55	190000000	undet.
108	16	neg.	undet.	-	undet.
109	23	neg.	24.65	4800000	undet.
110	9	neg.	24.09	7100000	undet.
111	5	neg.	37.54	5.9E+03	undet.
113	30	neg.	undet.	-	undet.
114	16	A	19.59	180000000	undet.
118	19	neg.	32.04	24000	undet.
119	20	A	20.92	70000000	undet.
120	21	A	20.43	100000000	undet.
121	19	neg.	undet.	-	undet.
122	20	neg.	undet.	-	undet.
123	29	A	21.48	47000000	undet.
124	18	neg.	undet.	-	undet.
126	18	neg.	undet.	-	undet.
127	5	neg.	undet.	-	30.41
128	18	neg.	18.39	430000000	undet.
129	20	neg.	undet.	-	undet.
130	32 mos.	neg.	undet.	-	undet.
131	35	B	undet.	-	21.73
132	48	neg.	undet.	-	undet.
133	12 mos	A	18.11	530000000	undet.
134	4	B	undet.	-	19.26
135	20	neg.	undet.	-	undet.
136	10	neg.	18.57	380000000	undet.
137	56	neg.	undet.	-	undet.
138	26	A	15.99	2400000000	undet.
140	23	neg.	23.28	13000000	undet.
144	23	A	17.8	660000000	undet.
149	19	neg.	undet.	-	undet.
152	23	neg.	undet.	-	29.8
160	21	neg.	18.24	480000000	undet.
167	8	A	22.55	22000000	undet.
175	38	neg.	undet.	-	undet.
176	23	neg.	13.93	11000000000	undet.
181	21	neg.	18.99	280000000	undet.
182	18	neg.	29.57	140000	undet.
185	7	neg.	undet.	-	undet.
187	4	neg.	undet.	-	undet.
192	20	neg.	15.05	4800000000	undet.
198	24	neg.	24.72	4600000	undet.
203	37	A	25.77	2100000	undet.
207	33	neg.	undet.	-	undet.
208	37	A	23.03	16000000	undet.
214	37	neg.	undet.	-	undet.
219	23	neg.	28.06	410000	undet.
222	14	neg.	undet.	-	undet.
227	6	neg.	undet.	-	undet.
228	52	neg.	32.54	19000	undet.
230	29	A	26.28	1500000	undet.
233	37	neg.	19.21	240000000	undet.
234	28	neg.	undet.	-	undet.
235	3	neg.	undet.	-	undet.
238	17	neg.	22.9	17000000	undet.
239	19	A	14.75	5900000000	undet.
241	43	neg.	undet.	-	undet.
242	48	neg.	undet.	-	undet.
256	23	neg.	undet.	-	undet.
257	12 mos.	neg.	undet.	-	undet.
261	19	neg.	15.46	3600000000	undet.
264	29	neg.	undet.	-	undet.
269	22 mos.	neg.	undet.	-	undet.
276	35	neg.	undet.	-	undet.
278	29	neg.	undet.	-	undet.
280	14	neg.	undet.	-	undet.
284	47	neg.	undet.	-	undet.
287	37	neg.	undet.	-	undet.
288	54	neg.	undet.	-	undet.
(undet. = undetected)
The bolded samples were also tested in the microfluidic assay.
No influenza A viral load was calculated when the RT-PCR was undetermined.
Viral loads were not calculated for the influenza B positive samples.
